# Supplementary material
Source: publisher figshare collection journal article supplement (https://gsapubs.figshare.com/ndownloader/files/34321385)
Supplement: Supplementary file 1 [file 34321385]

## Sheet: DACAO
DACAO
sample	strata height (m)	δ13Corg (‰)
DC-001	1.4	-24.545
DC-007	4	-22.6151
DC-008	4.48	-22.3277
DC-011	5.8	-22.834
DC-012	6.2	-23.2553
DC-013	6.6	-23.7714
DC-014	7	-24.0229
DC-015	7.4	-23.79
DC-017	8.2	-24.1513
DC-021	10.4	-24.23
DC-028	13.6	-25.647
DC-032	15.2	-24.7692
DC-043	19.8	-24.664
DC-044	20	-24.4158
DC-045	20.2	-24.779
DC-046	20.4	-24.696
DC-047	20.6	-24.3674
DC-048	20.8	-24.3316
DC-049	21	-24.2368
DC-050	21.2	-25.389
DC-051	21.4	-24.5116
DC-052-b	21.6	-23.267
DC-053	21.8	-24.421
DC-054	22	-24.2107
DC-055	22.2	-23.634
DC-063	23.8	-23.1806
DC-064	24	-25.06
DC-065	24.2	-23.7477
DC-066	24.4	-24.7316
DC-068	24.8	-24.936
DC-069	25	-25.513
DC-070	25.2	-24.527
DC-071	25.4	-25.659
DC-072	25.6	-24.067
DC-073	25.8	-25.516
DC-074	26	-25.724
DC-075	26.2	-25.776
DC-076	26.4	-25.143
DC-077	26.6	-26.135
DC-078	26.72	-24.877
DC-079	27	-25.317
DC-080	27.12	-25.175
DC-081	27.32	-25.099
DC-082	27.52	-24.856
DC-083	27.76	-23.231
DC-084	28	-23.3645
DC-085	28.16	-24.246
DC-086	28.36	-24.214
DC-087	28.56	-24.705
DC-088	28.76	-24.457
DC-089	28.96	-24.928
DC-090	29.2	-24.6531
DC-091	29.52	-25.7007
DC-092	29.72	-24.673
DC-093	29.96	-24.321
DC-094	30.16	-25.337
DC-095	30.36	-25.729
DC-096	30.6	-24.908
DC-097	30.8	-24.327
DC-098	31	-24.265
DC-099	31.2	-24.141
DC-100	31.4	-24.2498
DC-101	31.6	-24.763
DC-102	31.8	-24.1494
DC-103	32	-24.0412
DC-106	32.6	-23.4831
DC-109	33.4	-24.595
DC-110	33.64	-24.561
DC-111	33.88	-24.525
DC-112	34.12	-24.64
DC-113	34.4	-24.563
DC-114	34.68	-24.499
DC-115	34.92	-25.926
DC-116	35.24	-23.729
DC-117	35.48	-25.347
DC-118	35.76	-23.8458
DC-120	36.32	-24.427
DC-123	37.2	-24.933
DC-155	37.2	-24.068
DC-124	37.4	-24.0317
DC-156	37.4	-24.16
DC-157	37.6	-24.173
DC-158	37.8	-24.13
DC-159	38	-24.094
DC-160	38.2	-24.178
DC-161	38.4	-23.969
DC-162	38.6	-23.992
DC-163	38.8	-23.357
DC-164	39	-23.71
DC-165	39.2	-24.44
dat 001	39.32	-23.7758
DC-166	39.4	-25.028
DC-167	39.64	-24.215
dat 002	39.72	-23.782
DC-168	39.88	-24.555
DC-169	40.08	-24.527
DC-170	40.24	-25.796
dat 003	40.36	-21.3297
DC-171	40.44	-26.912
DC-172	40.76	-26.201
DC-173	41	-25.662
DC-174	41.2	-26.279
dat 004	41.28	-26.4726
DC-175	41.4	-25.821
DC-176	41.6	-26.356
DC-177	41.8	-25.315
dat 005	41.8	-25.5191
DC-178	42	-25.922
DC-179	42.2	-26.648
DC-180	42.4	-26.127
dat 006	42.4	-26.6155
DC-181	42.6	-25.734
DC-182	42.8	-26.406
DC-183	43	-26.201
dat 007	43.08	-25.5611
DC-184	43.2	-26.253
DC-185	43.4	-25.755
DC-186	43.6	-25.818
dat 008	43.6	-26.34
DC-187	43.8	-26.684
DC-188	44	-26.592
dat 009	44	-26.7747
DC-189	44.2	-25.542
DC-190	44.4	-25.827
dat 010	44.4	-26.6507
DC-191	44.6	-26.201
DC-192	44.8	-25.351
dat 011	44.8	-25.512
DC-193	45	-25.393
DC-194	45.2	-25.438
dat 012	45.2	-26.0647
DC-195	45.4	-25.877
dat 013	45.68	-26.2415
DC-197	45.8	-26.712
dat 014	46.16	-26.5924
DC-199	46.2	-27.777
dat 015	46.68	-26.2374
dat 016	47.28	-26.7465
dat 017	47.88	-26.3967
dat 018	48.44	-25.1476
dat 19	48.88	-25.5109
dat 020	49.36	-26.1566
dat 021	50	-25.5055
dat 022	50.72	-24.115
dat 023	51.48	-29.9399
dat 24	51.96	-30.3059
dat 025	52.32	-31.9885
dat 026	52.88	-32.3754
dat 027	53.32	-31.7888
dat 028	54.4	-31.4533
dat 029	54.8	-31.2875
dat 030	55.4	-32.4877
dat 031	56.48	-29.9785
dat 032	57.08	-28.8938
dat 033	57.72	-31.6782
dat 034	58.28	-32.2487
dat 035	58.88	-31.6102
dat 036	59.48	-32.0265
dat 037	59.88	-32.1149
dat 038	60.28	-32.0741
dat 039	60.68	-31.9806
dat 40	61.28	-31.615
dat 041	62.12	-32.3335
dat 042	62.6	-32.3151
DC-201	62.8	-31.809
DC-202	63.2	-31.542
dat 043	63.28	-31.6871
DC-203	63.6	-31.896
dat 044	63.8	-28.6412
DC-204	64	-31.565
dat 045	64.28	-27.6222
DC-205	64.4	-32.565
dat 046	64.64	-27.5451
DC-206	64.8	-31.826
dat 047	65.04	-26.8751
DC-207	65.2	-26.68
DC-208	65.6	-28.17
dat 048	65.64	-24.6188
DC-209	66	-28.623
dat 049	66.08	-26.464
DC-210	66.4	-28.09
dat 050	66.64	-27.9061
DC-211	66.8	-28.426
DC-212	67.2	-27.5886
dat 051	67.8	-26.6865
DC-214	68	-26.687
DC-215	68.4	-28.417
dat 052	68.64	-27.038
DC-216	68.8	-27.2928
DC-217	69.2	-27.4009
dat 053	69.52	-23.5459
DC-219	70	-25.3627
DC-220	70.4	-25.2227
dat 54	70.56	-24.8096
DC-221	70.8	-26.803
dat 055	71.28	-29.3934
DC-223	71.6	-28.57
DC-224	72	-28.8478
dat 056	72.32	-27.0069
dat 057	73.12	-31.4831
dat 058	73.92	-31.7197
DC-230	74.4	-30.9097
dat 059	74.88	-31.674
DC-232	75.2	-30.261
DC-233	75.6	-30.766
dat 060	75.88	-30.5839
DC-235	76.4	-29.7854
dat 061	76.92	-32.3103
dat 062	77.72	-32.175
dat 63	79.28	-30.8492
dat 064	80.32	-29.2478
dat 065	81.28	-29.7202
dat 067	83.28	-30.1601
dat 068	84.32	-30.2499
dat 069	85.28	-30.5862
dat 070	86.28	-27.5432
dat 071	87.32	-26.3119
dat 072	88.28	-25.2993
DC-239	89.28	-27.444
dad 00	89.28	-26.0156
dat 074	90	-24.3489
dad 01	91.58	-23.5441
DC-241	91.8	-24.1235
dad 02	92.38	-23.7967
dad 04	94.58	-23.7288
dad 05	95.88	-23.753
dad 06	98.08	-23.8628
DC-243	99.24	-28.4651
dad 07	99.43	-24.6735
dad 08	100.43	-24.925
dad 09	101.93	-28.1091
DC-244	107.4	-28.913
DC-245	108.4	-26.769
DC-246	109.08	-26.231
DC-247	109.8	-25.48
DC-248	110.8	-24.893
DC-249	111.56	-26.943
DC-250	111.8	-26.028
DC-252	114.4	-25.855
DC-253	116.68	-24.769
DC-254	117.48	-25.825
DC-255	118.6	-25.76

## Sheet: LIANGSHUIJING
LIANGSHUIJING
sample name	strata height (m referred to correlation with the Dacao section)	δ13Corg (‰)
lsj 001	85.08	-31.3899
lsj 002	85.28	-30.588
lsj 003	85.48	-30.2341
lsj 004	85.68	-30.4938
lsj 005	86	-29.6224
lsj 006	86.28	-28.9961
lsj 007	86.52	-28.2235
lsj 008	86.88	-27.8454
lsj 009	87.28	-27.4333
lsj 010	87.6	-27.7947
lsj 012	88.12	-27.4708
lsj 013	88.32	-26.887
lsj 018	89.28	-28.1693
lsj 019	89.6	-28.5354
lsj 020	90.04	-26.7055
lsj 021	90.48	-27.4652
lsj 022	90.88	-27.8079
lsj 024	91.52	-26.1628
lsj 025	91.76	-27.2589
lsj 026	92.08	-27.8376
lsj 027	92.32	-26.828
lsj 028	92.68	-26.6799
lsj 029	92.88	-27.2375
lsj 030	93.28	-24.5327
lsj 031	93.6	-24.8283
lsj 032	94.08	-24.5569
lsj 034	94.52	-25.5285
lsj 035	94.68	-27.5281
lsj 036	94.88	-24.9694
lsj 037	95.16	-25.2089
lsj 039	95.8	-25.0563
lsj 040	96.08	-27.2527
lsj 042	96.72	-24.9524
lsj 043	97.08	-25.1691
lsj 050	99.72	-25.2156
lsj 051	99.88	-24.9219
lsj 052	100.08	-24.9526
lsj 053	100.24	-25.3476
lsj 055	100.68	-26.4342
lsj 056	100.96	-27.0989
lsj 057	101.16	-28.2749
lsj 059	101.48	-29.349
lsj 062	102.08	-27.096
lsj 063	102.28	-30.7681
lsj 064	102.6	-30.1566
lsj 065	102.8	-29.9873
lsj 066	102.92	-28.5718
lsj 067	103.08	-28.2272
lsj 068	103.28	-27.6291
lsj 070	103.68	-27.5328
lsj 071	103.88	-26.9296
lsj 072	104.08	-26.7066
lsj 073	104.32	-26.0844
lsj 076	104.44	-25.2242
lsj 087	107.32	-29.3224
lsj 088	107.52	-28.5904
lsj 089	107.72	-28.6547
lsj 090	107.88	-28.1571
lsj 091	108.12	-27.435
lsj 092	108.28	-26.7984
lsj 094	108.68	-27.4902
lsj 095	108.88	-26.517
lsj 096	109.04	-27.6248
lsj 097	109.24	-27.6577
lsj 098	109.4	-26.4914
lsj 099	109.6	-25.8983
lsj 100	109.8	-25.4654
lsj 101	110	-25.3387
lsj 103	110.36	-26.1536
lsj 105	110.72	-25.6027
lsj 107	111.12	-25.4019
lsj 108	111.28	-23.4919
lsj 117	112.88	-26.2999
lsj 118	113.2	-26.1925
lsj 119	113.44	-25.7678
lsj 120	113.68	-27.0498
lsj 121	114.08	-27.1116
lsj 122	114.36	-26.1086
lsj 123	114.6	-26.3118
lsj 124	114.88	-24.8838
lsj 125	115.08	-26.7604
lsj 126	115.36	-26.7954
lsj 127	115.64	-26.5717
